# Supplementary material for: Tolfenamic Acid Derivatives: A New Class of Transcriptional Modulators with Potential Therapeutic Applications for Alzheimer’s Disease and Related Disorders
Source: MDPI journal article supplement (doi:10.3390/ijms242015216), 2023-10-16
Supplement: s1 [file s1]

## Supplementary Materials

### **Tolfenamic Acid Derivatives: A new class of transcriptional modulators with potential therapeutic applications for Alzheimer's Disease and related disorders**

Jaunetta Hill, Karim E. Shalaby, *et al.*

\*Corresponding author. Email: nzawia@uri.edu

**This PDF file includes:**

Tables S1 to S3

**Table S1.** Enriched transcription factor (TF) binding motifs in promoter regions 300bp and 600bp upstream of genes with reduced (↓) or enhanced (↑) SP1-DNA binding following treatment with TA, TN3, or TN7 detected using ChIP-Seq

|     | ↓                 |        |            |                  | ↑          |                     |
|-----|-------------------|--------|------------|------------------|------------|---------------------|
|     | Motif             | TF     | TF family  | Motif            | TF         | TF family           |
| TA  | CG                | KDM2B  | CxxC       | TTTTAATTGGTT     | NKX6-1     | Homeodomain         |
|     | GCCTGAGG          | TFAP2E | AP-2       | TAATATT          | ARID5A     | ARID/BRIGHT         |
|     | GACACGTGC         | HEYL   | bHLH       | TTACCAAA         | CEBPA      | bZIP                |
|     | CACGCG            | HES4   | bHLH       | CATAATTACAT      | POU2F1     | Homeodomain,<br>POU |
|     | CACGTG            | TCFL5  | bHLH       | ATCA             | HDX        | Homeodomain         |
|     | GGGG              | ZNF202 | C2H2 ZF    | TAATT            | SHOX       | Homeodomain         |
|     | GGGCGTG           | KLF7   | C2H2 ZF    | GTTAATTATTAACCAA | HNF1A      | Homeodomain         |
|     | TGCGGG            | ZBTB1  | C2H2 ZF    | TAATTACCATTATC   | ALX1       | Homeodomain         |
|     | GGGGGTGG          | ZNF281 | C2H2 ZF    | ATTTGCATAT       | POU2F2     | Homeodomain,<br>POU |
|     | GGGGGGT           | ZIC5   | C2H2 ZF    | GGTAATTATTAACC   | HNF1A      | Homeodomain         |
|     | CG                | CGBP   | CxxC       | ATCAATCAA        | PBX1       | Homeodomain         |
|     | CG                | MLL    | CxxC       | ATTGCAAAA        | CEBPA      | bZIP                |
|     | CCG               | DNMT1  | CxxC       | AATTAGCATAGA     | POU2F1     | Homeodomain,<br>POU |
|     | CG                | TET1   | CxxC       | GTTAATTATTAACC   | HNF1A      | Homeodomain         |
|     | GGCGCC            | E2F2   | E2F        | TATA             | TBPL2      | TBP                 |
|     | TGCGGG            | GCM1   | GCM        | TTTAAT           | ARID3C     | ARID/BRIGHT         |
|     | TTTGCGCC          | MYPOP  | Myb/SANT   | AT               | HLX        | Homeodomain         |
|     | ACGT              | GMEB1  | SAND       | TGT              | IRX4       | Homeodomain         |
|     | GGGCAGCCAAGCGTGAC | PAX5   | Paired box | TAAT             | HOXC5      | Homeodomain         |
|     | GGGCGGGAG         | E2F1   | E2F        | TTATGTTAAATC     | CDC5L      | Myb/SANT            |
|     | CCGGAAG           | ELK1   | Ets        | TATTAAT          | ARID3B     | ARID/BRIGHT         |
|     |                   |        |            | ATT              | SOX1       | Sox                 |
|     |                   |        |            | TAAT             | AC012531.1 | Homeodomain         |
|     |                   |        |            | TTTGAAT          | LIN54      | CxC                 |
|     |                   |        |            | TAAT             | HOXD3      | Homeodomain         |
|     |                   |        |            | ATAAA            | CDX4       | Homeodomain         |
|     |                   |        |            | TTTAT            | HOXB9      | Homeodomain         |
|     |                   |        |            | CTTAATTG         | NKX2-5     | Homeodomain         |
|     |                   |        |            | AT               | DBX2       | Homeodomain         |
|     |                   |        |            | TAAT             | HOXB4      | Homeodomain         |
|     |                   |        |            | ATCATAATATTT     | FOXJ2      | Forkhead            |
|     |                   |        |            | GTAATTAA         | HOXC9      | Homeodomain         |
|     |                   |        |            | ATATAAT          | HMG20B     | Sox                 |
|     |                   |        |            | TAAT             | NKX6-3     | Homeodomain         |
| TN3 | CG                | KDM2B  | CxxC       | TAATATT          | ARID5A     | ARID/BRIGHT         |
|     | GCCTGAGG          | TFAP2E | AP-2       | TAATTACCATTATC   | ALX1       | Homeodomain         |
|     | GACACGTGC         | HEYL   | bHLH       | ATTGT            | SOX11      | Sox                 |
|     | CACGCG            | HES4   | bHLH       | TTTTAATTGGTT     | NKX6-1     | Homeodomain         |
|     | CACGTG            | TCFL5  | bHLH       | ATTGT            | SOX12      | Sox                 |
|     | GGGG              | ZNF202 | C2H2 ZF    | TAAATAAATATTTT   | FOXA2      | Forkhead            |
|     | GGGCGTG           | KLF7   | C2H2 ZF    | ACATA            | FOXL1      | Forkhead            |
|     | TGCGGG            | ZBTB1  | C2H2 ZF    | AATTAGCATAGA     | POU2F1     | Homeodomain,<br>POU |
|     | GGGGGTGG          | ZNF281 | C2H2 ZF    | GTTAATTATTAACC   | HNF1A      | Homeodomain         |
|     | GGGGGGT           | ZIC5   | C2H2 ZF    | ATTAATTAAT       | POU6F1     | Homeodomain         |

|     |                   |        |            |                |            |                     |
|-----|-------------------|--------|------------|----------------|------------|---------------------|
|     | CG                | CGBP   | CxxC       | TAATTA         | LHX2       | Homeodomain         |
|     | CG                | MLL    | CxxC       | TTATGTTAAATC   | CDC5L      | Myb/SANT            |
|     | CCG               | DNMT1  | CxxC       | TAA            | TLX2       | Homeodomain         |
|     | CG                | TET1   | CxxC       | AT             | HLX        | Homeodomain         |
|     | GGCGCC            | E2F2   | E2F        | TATTAAT        | ARID3B     | ARID/BRIGHT         |
|     | TGCGGG            | GCM1   | GCM        | TTTAAT         | ARID3C     | ARID/BRIGHT         |
|     | TTTGCGCC          | MYPOP  | Myb/SANT   | AT             | DBX2       | Homeodomain         |
|     | CCTGGCAAC         | RFX6   | RFX        | TAAT           | NKX6-3     | Homeodomain         |
|     | ACGT              | GMEB1  | SAND       | ATT            | SOX1       | Sox                 |
|     | GCCTCAGGGCA       | TFAP2A | AP-2       | ATCATAATATTT   | FOXJ2      | Forkhead            |
|     | GGGCAGCCAAGCGTGAC | PAX5   | Paired box | TCATTA         | POU2F1     | Homeodomain,<br>POU |
|     |                   |        |            | TAAT           | AC012531.1 | Homeodomain         |
|     |                   |        |            | TAATT          | NOBOX      | Homeodomain         |
|     |                   |        |            | TAATT          | LHX5       | Homeodomain         |
|     |                   |        |            | TAAT           | HOXD3      | Homeodomain         |
|     |                   |        |            | TGT            | IRX4       | Homeodomain         |
|     |                   |        |            | AA             | HOXA2      | Homeodomain         |
|     |                   |        |            | TAAT           | LHX4       | Homeodomain         |
|     |                   |        |            | AAACAAT        | SRY        | Sox                 |
|     |                   |        |            | TAAT           | HOXC5      | Homeodomain         |
|     |                   |        |            | TAAT           | HOXB4      | Homeodomain         |
|     |                   |        |            | ATATAAT        | HMG20B     | Sox                 |
|     |                   |        |            | ACGTAAACAAC    | FOXO4      | Forkhead            |
| TN7 | CG                | KDM2B  | CxxC       | TAATATT        | ARID5A     | ARID/BRIGHT         |
|     | GCCTGAGG          | TFAP2E | AP-2       | ATATAAT        | HMG20B     | Sox                 |
|     | GACACGTGC         | HEYL   | bHLH       | TAAT           | LHX4       | Homeodomain         |
|     | CACGCG            | HES4   | bHLH       | TTTTTAATTGGTT  | NKX6-1     | Homeodomain         |
|     | CACGTG            | TCFL5  | bHLH       | TAATTACCATTATC | ALX1       | Homeodomain         |
|     | GGGG              | ZNF202 | C2H2 ZF    | AT             | DBX2       | Homeodomain         |
|     | GGGCGTG           | KLF7   | C2H2 ZF    | ATTGCAAAA      | CEBPA      | bZIP                |
|     | TGCGGG            | ZBTB1  | C2H2 ZF    | TAATT          | NOBOX      | Homeodomain         |
|     | GGGGGTGG          | ZNF281 | C2H2 ZF    | ATTA           | ZFHX3      | Homeodomain         |
|     | GGGGGGT           | ZIC5   | C2H2 ZF    | ATTGT          | SOX12      | Sox                 |
|     | CG                | CGBP   | CxxC       | CTAAAAATAG     | MEF2A      | MADS box            |
|     | CG                | MLL    | CxxC       | ATTGT          | SOX11      | Sox                 |
|     | CCG               | DNMT1  | CxxC       | TGT            | IRX4       | Homeodomain         |
|     | CG                | TET1   | CxxC       | AT             | HLX        | Homeodomain         |
|     | GGCGCC            | E2F2   | E2F        | TATTAAT        | ARID3B     | ARID/BRIGHT         |
|     | TGCGGG            | GCM1   | GCM        | TTTAAT         | ARID3C     | ARID/BRIGHT         |
|     | TTTGCGCC          | MYPOP  | Myb/SANT   | ATT            | SOX1       | Sox                 |
|     | CCTGGCAAC         | RFX6   | RFX        | TAAATAAATATTTT | FOXA2      | Forkhead            |
|     | ACGT              | GMEB1  | SAND       | ATAAA          | CDX4       | Homeodomain         |
|     | GCCTCAGGGCA       | TFAP2A | AP-2       | TAAT           | NKX6-3     | Homeodomain         |
|     | GGGCAGCCAAGCGTGAC | PAX5   | Paired box | ACGTAAACAAC    | FOXO4      | Forkhead            |
|     |                   |        |            | ATGTAAACAACAA  | FOXO3      | Forkhead            |
|     |                   |        |            | TATA           | TBPL2      | TBP                 |
|     |                   |        |            | TTTAT          | HOXB9      | Homeodomain         |
|     |                   |        |            | AA             | HOXA2      | Homeodomain         |
|     |                   |        |            | TAAT           | AC012531.1 | Homeodomain         |
|     |                   |        |            | AAACAAT        | SRY        | Sox                 |
|     |                   |        |            | TTTGAAT        | LIN54      | CxC                 |
|     |                   |        |            | GTAATTAA       | HOXC9      | Homeodomain         |

|  |              |       |             |
|--|--------------|-------|-------------|
|  | ATCATAATATTT | FOXJ2 | Forkhead    |
|  | TTGTT        | ZNF35 | C2H2 ZF     |
|  | TAAT         | HOXC5 | Homeodomain |

**Table S2.** Enriched transcription factor (TF) binding motifs in promoter regions 300bp and 600bp upstream of differentially expressed genes following treatment with TA, TN3, or TN7 detected using mRNA-Seq or LC-MS-MS.

| mRNAseq |                     |        | LC-MS-MS   |            |                     |
|---------|---------------------|--------|------------|------------|---------------------|
|         | Motif               | TF     | TF family  | Motif      | TF family           |
| TA      | GGGGGCGGGG          | SP1    | C2H2 ZF    | CG         | TET1<br>CxxC        |
|         | GGGGGGGGGTGGTTTGGGG | RREB1  | C2H2 ZF    | CACGTG     | TCFL5<br>bHLH       |
|         | GGGCAGCCAAGCGTGAC   | PAX5   | Paired box | ACGT       | GMEB1<br>SAND       |
|         | CGAGGCGCAGTGATGCGTA | PAX5   | Paired box | GCGGGGGCGG | EGR1<br>C2H2 ZF     |
|         | GCGGC               |        |            | GG         |                     |
|         | CG                  | CGBP   | CxxC       | GGGGGCGGGG | SP2<br>C2H2 ZF      |
|         | CCCCGGGC            | TFAP2C | AP-2       | C          | MLL<br>CxxC         |
|         | TGCGGG              | ZBTB1  | C2H2 ZF    | CCG        | DNMT1<br>CxxC       |
|         | TGCGGG              | GCM1   | GCM        | CG         | KDM2B<br>CxxC       |
|         | GGGGCCCAAGGGGG      | PLAG1  | C2H2 ZF    | CG         | CGBP<br>CxxC        |
|         | CCAATGGCGGTTGGGGG   | MYB    | Myb/SANT   | GGGGGCGGGG | SP1<br>C2H2 ZF      |
|         | CACGTG              | TCFL5  | bHLH       | ATGCGTGGGC | EGR4<br>C2H2 ZF     |
|         | GGCGGGAA            | E2F4   | E2F        | GG         |                     |
|         | GGCGGGAG            | E2F1   | E2F        | TGCGTGGGCG | EGR3<br>C2H2 ZF     |
|         | GGGG                | ZNF202 | C2H2 ZF    | T          |                     |
|         | CCCCGGGC            | TFAP2A | AP-2       | GGCGGGAA   | E2F4<br>E2F         |
|         |                     |        |            | GGGCGGGAG  | E2F1<br>E2F         |
|         |                     |        |            | GCGGCC     | E2F2<br>E2F         |
|         | GGGGGGGGGGCC        | PATZ1  | C2H2 ZF    | GCGCAGGCGC | NRF1<br>Unkno<br>wn |
|         | TGTCAGGGGGC         | INSM1  | C2H2 ZF    | TGCGTGGGCG | EGR1<br>C2H2 ZF     |
|         |                     |        |            | T          |                     |
|         | TGCGTGGGCGT         | EGR3   | C2H2 ZF    | TGCGTGGGCG | EGR2<br>C2H2 ZF     |
|         | GGGGCGCAGCTGCGTCCC  | NHLH1  | bHLH       | CACGCG     | HES4<br>bHLH        |
|         | GCCCTGGGGC          | TFAP2C | AP-2       | GCGGACGTT  | HINFP<br>C2H2 ZF    |
|         | CCG                 | DNMT1  | CxxC       | GGGCGGGAA  | E2F6<br>E2F         |
|         | TGGCCACCAGGGGGCGC   | CTCF   | C2H2 ZF    |            |                     |
|         | GCCGAGGCCT          | ZFY    | C2H2 ZF    |            |                     |
|         | GCGGCC              | E2F2   | E2F        |            |                     |
|         | AGATCTCGCGAGA       | ZBTB33 | C2H2 ZF    |            |                     |
|         | GGGGGCGGGGC         | SP2    | C2H2 ZF    |            |                     |
|         | GGGCGGGGC           | KLF5   | C2H2 ZF    |            |                     |
|         | GGGCGTG             | KLF7   | C2H2 ZF    |            |                     |
|         | GCGGGGGCGGGG        | EGR1   | C2H2 ZF    |            |                     |
|         | CG                  | TET1   | CxxC       |            |                     |

|     |                                    |                         |                                                                               |                  |           |             |
|-----|------------------------------------|-------------------------|-------------------------------------------------------------------------------|------------------|-----------|-------------|
|     | TTGTT<br>AAACAAACAAT<br>TAAACAAACA | ZNF35<br>FOXD3<br>FOXI1 | C2H2 ZF<br>Forkhead<br>Forkhead<br>Homeodoma<br>in, Paired<br>box<br>Forkhead |                  |           |             |
|     | GGGTGG                             | PAX4                    |                                                                               |                  |           |             |
|     | AAACAAACATTC                       | FOXE1                   |                                                                               |                  |           |             |
| TN3 | GGCGCC                             | E2F2                    | E2F                                                                           | CACGTG           | TCFL<br>5 | bHLH        |
|     | AGATCTCGCGAGA                      | ZBTB33                  | C2H2 ZF                                                                       | CG               | CGBP      | CxxC        |
|     | GCGCAGGCGC                         | NRF1                    | Unknown                                                                       | CG               | KDM2<br>B | CxxC        |
|     | CG                                 | TET1                    | CxxC                                                                          | CG               | MLL       | CxxC        |
|     | CACGTG                             | TCFL5                   | bHLH                                                                          | CCG              | DNM<br>T1 | CxxC        |
|     | CACGCG                             | HES4                    | bHLH                                                                          | CG               | TET1      | CxxC        |
|     | ACGT                               | GMEB1                   | SAND                                                                          | ACGT             | GMEB<br>1 | SAND        |
|     | TTTGAAT                            | LIN54                   | CxC                                                                           | GCGCAGGCGC       | NRF1      | Unkno<br>wn |
|     | CG                                 | KDM2B                   | CxxC                                                                          | GGGGGCGGGG<br>C  | SP2       | C2H2<br>ZF  |
|     | TTTGCGCC                           | MYPOP                   | Myb/SANT                                                                      | GGGCGGGAG        | E2F1      | E2F         |
|     | TTGGCGCGAAAATTG                    | E2F1                    | E2F                                                                           | GGCGCC           | E2F2      | E2F         |
|     | TCGCGCCAAA                         | E2F1                    | E2F                                                                           | GGCGGGAA         | E2F4      | E2F         |
|     | TGCGGG                             | ZBTB1                   | C2H2 ZF                                                                       | GCGGACGTT        | HINF<br>P | C2H2<br>ZF  |
|     | GCCTCAGGGCA                        | TFAP2A                  | AP-2                                                                          | GCGGGGGCGG<br>GG | EGR1      | C2H2<br>ZF  |
|     | GTGGGGA                            | MZF1                    | C2H2 ZF                                                                       | CCGGAAG          | ELK1      | Ets         |
|     | GGGG                               | ZNF202                  | C2H2 ZF                                                                       | GGGGGCGGGG       | SP1       | C2H2<br>ZF  |
|     | GGGGGGT                            | ZIC5                    | C2H2 ZF                                                                       | CACGCG           | HES4      | bHLH        |
|     | CG                                 | CGBP                    | CxxC                                                                          | TGCGTGGGCG<br>T  | EGR3      | C2H2<br>ZF  |
|     | CCG                                | DNMT1                   | CxxC                                                                          | CCGGAAGTG        | ELK4      | Ets         |
|     | GGGGCCCAAGGGGG                     | PLAG1                   | C2H2 ZF                                                                       | TGCGGG           | ZBTB<br>1 | C2H2<br>ZF  |
|     | GGGCGGGGC                          | KLF5                    | C2H2 ZF                                                                       | GGGCGTG          | KLF7      | C2H2<br>ZF  |
|     | CCCCGGGC                           | TFAP2A                  | AP-2                                                                          | GGGCGGGAA        | E2F6      | E2F         |
|     | CCCCGGGC                           | TFAP2C                  | AP-2                                                                          |                  |           |             |
|     | GGGGGGGGGCC                        | PATZ1                   | C2H2 ZF                                                                       |                  |           |             |
|     | GCCTGAGG                           | TFAP2E                  | AP-2                                                                          |                  |           |             |
|     | GCGGGGGCGGGG                       | EGR1                    | C2H2 ZF                                                                       |                  |           |             |
|     | GGGGGTGG                           | ZNF281                  | C2H2 ZF                                                                       |                  |           |             |
|     | GGGGGCGGGGC                        | SP2                     | C2H2 ZF                                                                       |                  |           |             |
|     | CG                                 | MLL                     | CxxC                                                                          |                  |           |             |
|     | GCCGAGGCCT                         | ZFY                     | C2H2 ZF                                                                       |                  |           |             |
|     | GGGGGCGGGG                         | SP1                     | C2H2 ZF                                                                       |                  |           |             |
|     | GCCCTGGGGC                         | TFAP2C                  | AP-2                                                                          |                  |           |             |
|     | GGGCGTG                            | KLF7                    | C2H2 ZF                                                                       |                  |           |             |
|     | GGGCGGGAG                          | E2F1                    | E2F                                                                           |                  |           |             |

|     |                   |                     |                 |                   |            |             |
|-----|-------------------|---------------------|-----------------|-------------------|------------|-------------|
|     | GGCGGGAA          | E2F4                | E2F             |                   |            |             |
| TN7 | GGGGGGGGGCC       | PATZ1               | C2H2 ZF         | CG                | TET1       | CxxC        |
|     | GGGCGGGAA         | E2F6                | E2F             | GCGCAGGCGC        | NRF1       | Unkno<br>wn |
|     | CACGTG            | TCFL5               | bHLH            | ACGT              | GMEB<br>1  | SAND        |
|     | CCG               | DNMT1               | CxxC            | CG                | MLL        | CxxC        |
|     | GGCGGGAA          | E2F4                | E2F             | CACGTG            | TCFL<br>5  | bHLH        |
|     | GGGGCCCAAGGGGG    | PLAG1               | C2H2 ZF         | GGCGCC            | E2F2       | E2F         |
|     | CG                | CGBP                | CxxC            | TGCGTGGGCG<br>T   | EGR3       | C2H2<br>ZF  |
|     | GGGGGCGGGGC       | SP2                 | C2H2 ZF         | CG                | KDM2<br>B  | CxxC        |
|     | GGCGCC            | E2F2                | E2F             | GGGGGCGGGG<br>C   | SP2        | C2H2<br>ZF  |
|     | CCCCGGGC          | TFAP2A              | AP-2            | TGCGGG            | ZBTB<br>1  | C2H2<br>ZF  |
|     | CCCCGGGC          | TFAP2C              | AP-2            | TGCGTGGGCG        | EGR2       | C2H2<br>ZF  |
|     | TGGCCACCAGGGGGCGC | CTCF                | C2H2 ZF         | TGCGTGGGCG<br>T   | EGR1       | C2H2<br>ZF  |
|     | TGCGGG            | ZBTB1               | C2H2 ZF         | CCG               | DNM<br>T1  | CxxC        |
|     | GCGGGGGCGGGG      | EGR1                | C2H2 ZF         | GGCGGGAA          | E2F4       | E2F         |
|     | GCGCAGGCGC        | NRF1                | Unknown         | TACG              | NAIF<br>1  | MADF        |
|     | GGGCGTG           | KLF7                | C2H2 ZF         | CG                | CGBP       | CxxC        |
|     | CACGCG            | HES4                | bHLH            | GCGGACGTT         | HINF<br>P  | C2H2<br>ZF  |
|     | CG                | TET1                | CxxC            | CACGCG            | HES4       | bHLH        |
|     | GGGCGGGAG         | E2F1                | E2F             | AGATCTCGCG<br>AGA | ZBTB<br>33 | C2H2<br>ZF  |
|     | GGGGGCGGGG        | SP1                 | C2H2 ZF         | ATGCGTGGGC<br>GG  | EGR4       | C2H2<br>ZF  |
|     | TGTCAGGGGGC       | INSM1               | C2H2 ZF         | GGGCGTG           | KLF7       | C2H2<br>ZF  |
|     | TGCGTGGGCGT       | EGR3                | C2H2 ZF         | GCGGGGGCGG<br>GG  | EGR1       | C2H2<br>ZF  |
|     | TAACGG            | KLF9                | C2H2 ZF         | GGGCGGGAG         | E2F1       | E2F         |
|     | CGTA              | HOXA3               | Homeodoma<br>in | GGGGGCGGGG        | SP1        | C2H2<br>ZF  |
|     | TTATGTAAATC       | CDC5L               | Myb/SANT        |                   |            |             |
|     | TTACATAA          | NFIL3               | bZIP            |                   |            |             |
|     | AAACAAACAAT       | FOXD3               | Forkhead        |                   |            |             |
|     | ACGT              | ENSG0000025<br>0542 | bZIP            |                   |            |             |
|     | TTACGTAA          | ATF2                | bZIP            |                   |            |             |
|     | CTTAATTG          | NKX2-5              | Homeodoma<br>in |                   |            |             |
|     | AAACAAACATTC      | FOXO1               | Forkhead        |                   |            |             |
|     | GTAAT             | EN1                 | Homeodoma<br>in |                   |            |             |

|                       |               |                 |
|-----------------------|---------------|-----------------|
| TAGGAAATCGAAAGT<br>CG | IRF7<br>KDM2B | IRF<br>CxxC     |
| TAATTG                | BARHL1        | Homeodoma<br>in |
| TAAATAAATATTTTC       | FOXA2         | Forkhead        |
| TTTGAAT               | LIN54         | CxC             |
| TCGCGCCAAA            | E2F1          | E2F             |
| TTGTT                 | ZNF35         | C2H2 ZF         |
| GATATGATAAGATA        | MECOM         | C2H2 ZF         |

**Table S3.** Neuronal pathways affected by treatment with TA, TN3 or TN7 and the affected genes from each treatment that belong to the pathway.

| Pathway                                          | TA                                         | TN3                                                                                                                  | TN7                                        |
|--------------------------------------------------|--------------------------------------------|----------------------------------------------------------------------------------------------------------------------|--------------------------------------------|
| <b>Synaptogenesis Signaling Pathway</b>          |                                            | ACTR2, AP2A2, AP2B1, AP2M1, ARPC2, ARPC3, CACNA2D1, CDC42, CFL1, CTNNB1, HSPA8, NAP1L1, NAP1L4, RAB5A, RAP1B, SNAP25 | CDC42, CFL1, CTNNB1, HSPA8, MAPT           |
| <b>Synaptic Long Term Potentiation</b>           | GNA11, ITPR2, PDIA3, PPP3CA                | GNA11, GNAQ, ITPR2, PPP1CA, PRKCA, RAP1B                                                                             |                                            |
| <b>Synaptic Long Term Depression</b>             |                                            | CACNA2D1, GNA11, GNAI3, GNAQ, GNAS, ITPR2, PPP2CB, PPP2R1A, PRKCA, RAP1B, SMARCC2                                    | GNAI3, GNAS, PPP2CB, PPP2R1A, PRDX6, PRKCA |
| <b>SNARE Signaling Pathway</b>                   |                                            | CACNA2D1, HSPA8, MYH14, RAB1A, RAB2A, SNAP25                                                                         |                                            |
| <b>Regulation of Actin-based Motility by Rho</b> | ACTA1, CDC42, CFL1, MYL12B, PFN1, RHOC     | ACTA1, ACTR2, ARPC2, ARPC3, CDC42, CFL1, ITGB1, MYL12B, PFN1, RHOC                                                   | ACTA1, ARHGDI, CDC42, CFL1, MYL12B, PFN1   |
| <b>Reelin Signaling in Neurons</b>               |                                            | ACTR2, ARHGEF40, ARPC2, ARPC3, CDC42, CFL1, ITGB1, RAP1B                                                             |                                            |
| <b>Oxytocin In Brain Signaling Pathway</b>       |                                            | CACNA2D1, GNA11, GNAI3, GNAQ, GNG2, ITPR2, PRKCA, RAP1B                                                              | GNAI3, GNB2, PRDX6, PRKCA                  |
| <b>Opioid Signaling Pathway</b>                  |                                            | AP2A2, AP2B1, AP2M1, CACNA2D1, CDC42, CTNNB1, GNA11, GNAI3, GNAQ, GNAS, GNG2, ITPR2, PRKCA, RAP1B                    | CDC42, CTNNB1, GNAI3, GNAS, GNB2, PRKCA    |
| <b>Neurovascular Coupling Signaling Pathway</b>  |                                            | CACNA2D1, GNAQ, ITPR2, SMARCC2                                                                                       |                                            |
| <b>Myelination Signaling Pathway</b>             | ARHGAP1, CDC42, FASN, HDAC2, LMNB1, PPP3CA | ARHGAP1, CDC42, CTNNB1, HDAC2, ITGB1, RAP1B                                                                          | ARHGAP1, CDC42, CTNNB1, HDAC2              |

|                                                                                                        |                                     |                                                                                                  |                                                               |
|--------------------------------------------------------------------------------------------------------|-------------------------------------|--------------------------------------------------------------------------------------------------|---------------------------------------------------------------|
| <b>GPCR-Mediated<br/>Nutrient Sensing in<br/>Enteroendocrine Cells</b>                                 |                                     | CACNA2D1, GNA11,<br>GNAI3, GNAQ, GNAS,<br>GNG2, ITPR2, PRKCA                                     |                                                               |
| <b>GPCR-Mediated<br/>Integration of<br/>Enteroendocrine<br/>Signaling Exemplified<br/>by an L Cell</b> |                                     | GNA11, GNAI3, GNAQ,<br>GNAS, ITPR2                                                               |                                                               |
| <b>GNRH Signaling</b>                                                                                  |                                     | CACNA2D1, CDC42,<br>GNA11, GNAI3, GNAQ,<br>GNAS, GNG2, ITPR2,<br>PRKCA, RAP1B                    | CDC42, GNAI3, GNAS,<br>GNB2, PRKCA                            |
| <b>Ephrin Receptor<br/>Signaling</b>                                                                   | ACP1, CDC42, CFL1,<br>GNA11         | ACP1, ACTR2, ARPC2,<br>ARPC3, CDC42, CFL1,<br>GNA11, GNAI3, GNAQ,<br>GNAS, GNG2, ITGB1,<br>RAP1B | CDC42, CFL1, GNAI3,<br>GNAS, GNB2                             |
| <b>Ephrin B Signaling</b>                                                                              | ACP1, CDC42, CFL1,<br>GNA11, HNRNPK | ACP1, CAP1, CDC42, CFL1,<br>CTNNB1, GNA11, GNAI3,<br>GNAQ, GNAS, GNG2,<br>HNRNPK                 | CAP1, CDC42, CFL1,<br>CTNNB1, GNAI3,<br>GNAS, GNB2,<br>HNRNPK |
| <b>Endocannabinoid<br/>Neuronal Synapse<br/>Pathway</b>                                                |                                     | CACNA2D1, GNA11,<br>GNAI3, GNAQ, GNG2,<br>ITPR2                                                  |                                                               |
| <b>Endocannabinoid<br/>Developing Neuron<br/>Pathway</b>                                               |                                     | CTNNB1, GNAI3, GNG2,<br>RAP1B                                                                    |                                                               |
| <b>Dopamine-DARPP32<br/>Feedback in cAMP<br/>Signaling</b>                                             |                                     | CACNA2D1, GNAI3,<br>GNAQ, GNAS, ITPR2,<br>PPP1CA, PPP2CB, PPP2R1A,<br>PRKCA                      | GNAI3, GNAS,<br>PPP1CA, PPP2CB,<br>PPP2R1A, PRKCA             |
| <b>CREB Signaling in<br/>Neurons</b>                                                                   |                                     | CACNA2D1, GNA11,<br>GNAI3, GNAQ, GNAS,<br>GNG2, ITPR2, PRKCA,<br>RAP1B                           |                                                               |
| <b>Cholecystokinin/Gastrin<br/>-mediated Signaling</b>                                                 |                                     | CDC42, GNAQ, ITPR2,<br>PRKCA, RAP1B, RHOC                                                        |                                                               |
| <b>CDK5 Signaling</b>                                                                                  |                                     | CAPN1, GNAS, ITGB1,<br>PPP1CA, PPP2CB, PPP2R1A,<br>RAP1B                                         | GNAS, MAPT,<br>PPP1CA, PPP2CB,<br>PPP2R1A                     |
| <b>Agrin Interactions at<br/>Neuromuscular Junction</b>                                                |                                     | ACTA1, CDC42, ITGB1,<br>RAP1B                                                                    |                                                               |

---
